# Supplementary material
Source: publisher site journal article supplement (https://www.dovepress.com/article/336990)
Supplement: Supplementary file 1 [file get_supplementary_file.php]

Supplementary Table 1: Collinearity diagnostics steps.

|  | Step 1 | Step 2 | Step 3 |
| --- | --- | --- | --- |
| METS-IR | 25.4 | 4.8 | 4.8 |
| Sex | 2.3 | 2.3 | 2.3 |
| Age | 1.3 | 1.3 | 1.2 |
| BMI | 20.4 | NA | NA |
| WC | 3.5 | 3.3 | 3.3 |
| ALT | 3.8 | 3.8 | 3.7 |
| AST | 3.3 | 3.3 | 3.3 |
| GGT | 1.4 | 1.4 | 1.4 |
| HDL-C | 8.4 | 2.9 | 2.9 |
| TC | 1.4 | 1.4 | 1.4 |
| TG | 4.5 | 2 | 2 |
| HbA1c | 1.2 | 1.2 | 1.2 |
| FPG | 5.7 | 5.5 | NA |
| SBP | 5 | 5 | 1.3 |
| DBP | 5.1 | 5.1 | NA |
| Fatty liver | 1.3 | 1.3 | 1.3 |
| Habit of exercise | 1 | 1 | 1 |
| Alcohol consumption | 1.4 | 1.3 | 1.3 |
| Smoking status | 1.4 | 1.4 | 1.4 |

VIF: variance inflation factors. Other abbreviations as in Table 1.

VIF = 1/(1-R2). VIF step-by-step screening method: Calculate the VIF of each variable. If the maximum VIF value ≥5, remove the variable with the maximum VIF value
